# Supplementary material for: Evaluating Marine Cyanobacteria as a Source for CNS Receptor Ligands
Source: PubMed Central journal article supplement (PMC6222545; doi:10.3390/molecules23102665), 2018-10-17
Supplement: molecules-23-02665-s001.pdf [file molecules-23-02665-s001.pdf]

# Evaluating Marine Cyanobacteria as a Source for CNS Receptor Ligands

Andrea L. Rague, Stacy-Ann J. Parker, and Kevin J. Tidgewell

Department of Medicinal Chemistry, Mylan School of Pharmacy, Duquesne University,  
Pittsburgh, PA 15282, United States

## Contents of Supporting Information

| <b>Contents</b>                                                                                | <b>page</b> |
|------------------------------------------------------------------------------------------------|-------------|
| <b>Figure S1.</b> $^1\text{H}$ NMR spectrum of compound <b>2</b> in $\text{CDCl}_3$ at 500 MHz | <b>2</b>    |
| <b>Figure S2.</b> COSY spectrum of compound <b>2</b> in $\text{CDCl}_3$ at 500 MHz             | <b>3</b>    |
| <b>Figure S3.</b> HSQC spectrum of compound <b>2</b> in $\text{CDCl}_3$ at 500 MHz             | <b>4</b>    |
| <b>Figure S4.</b> HMBC spectrum of compound <b>2</b> in $\text{CDCl}_3$ at 500 MHz             | <b>5</b>    |
| <b>Figure S5.</b> GCMS spectrum of <b>2</b>                                                    | <b>6</b>    |

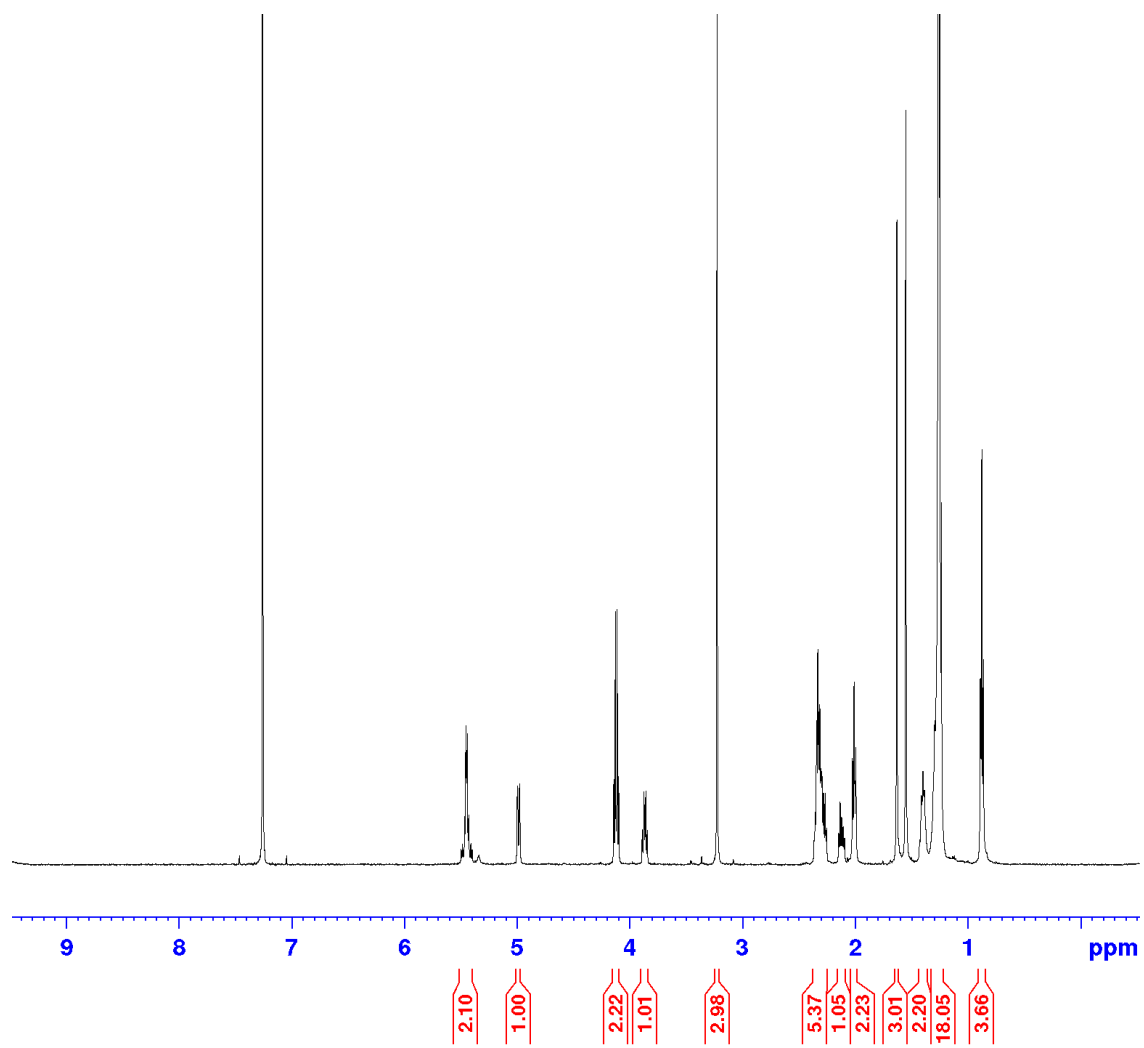

Figure S1. <sup>1</sup>H NMR spectrum of compound 2 in CDCl<sub>3</sub> at 500 MHz

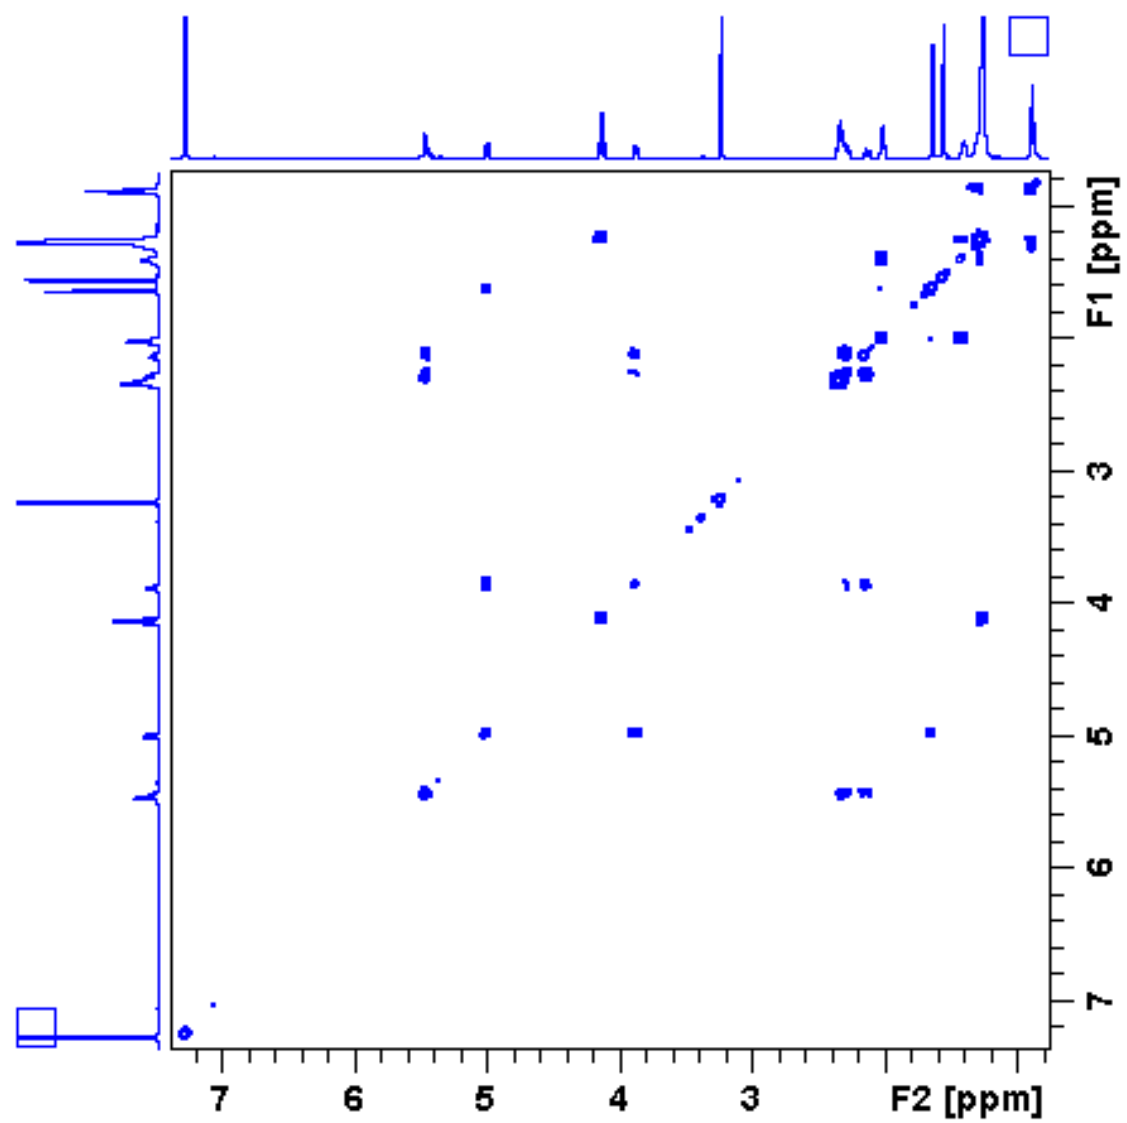

Figure S2. COSY spectrum of compound 2 in CDCl<sub>3</sub> at 500 MHz

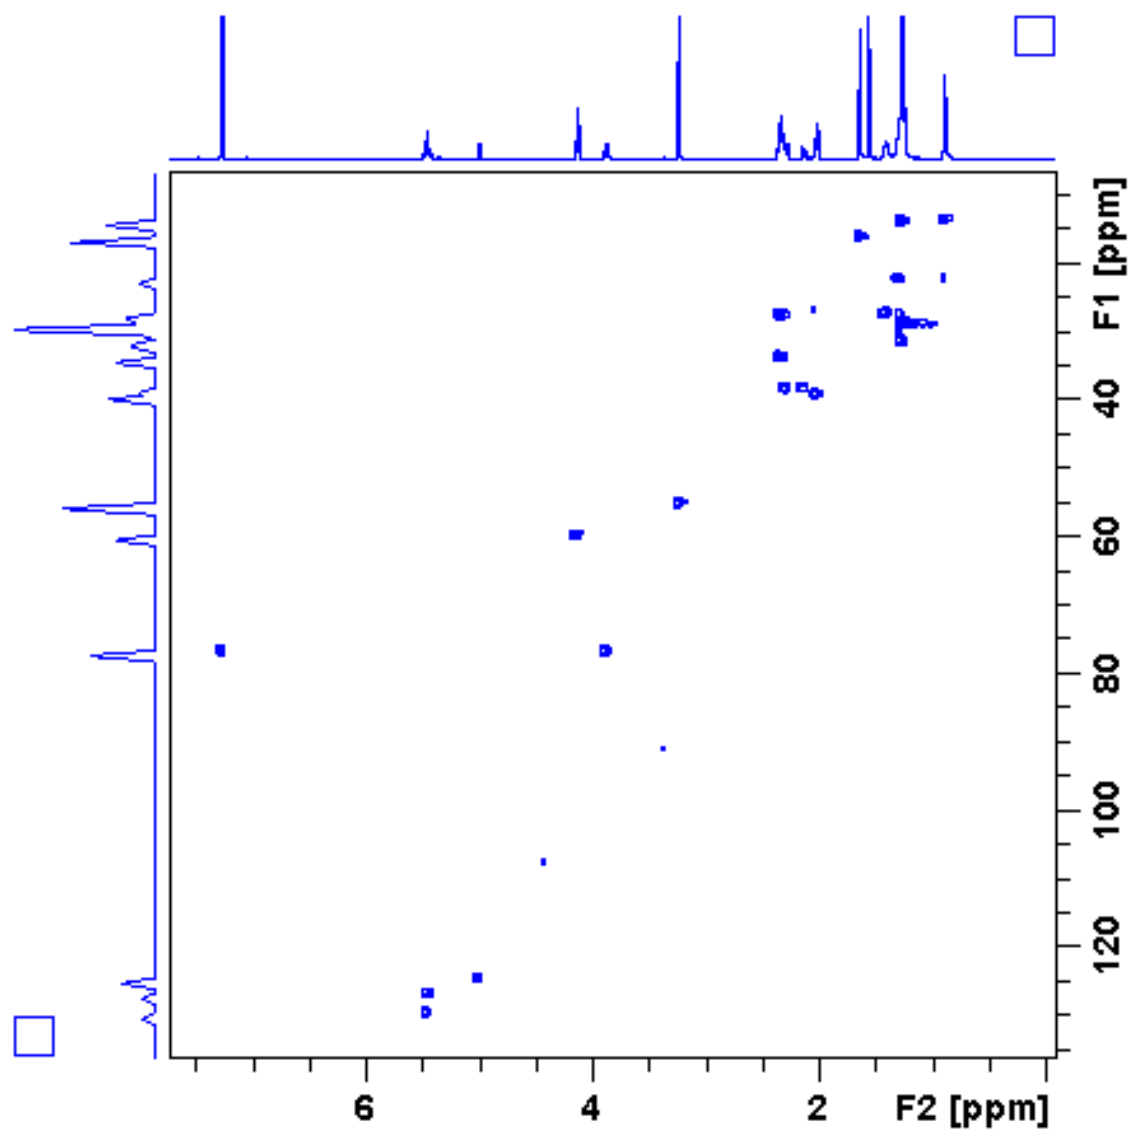

Figure S3. HSQC spectrum of compound 2 in CDCl<sub>3</sub> at 500 MHz

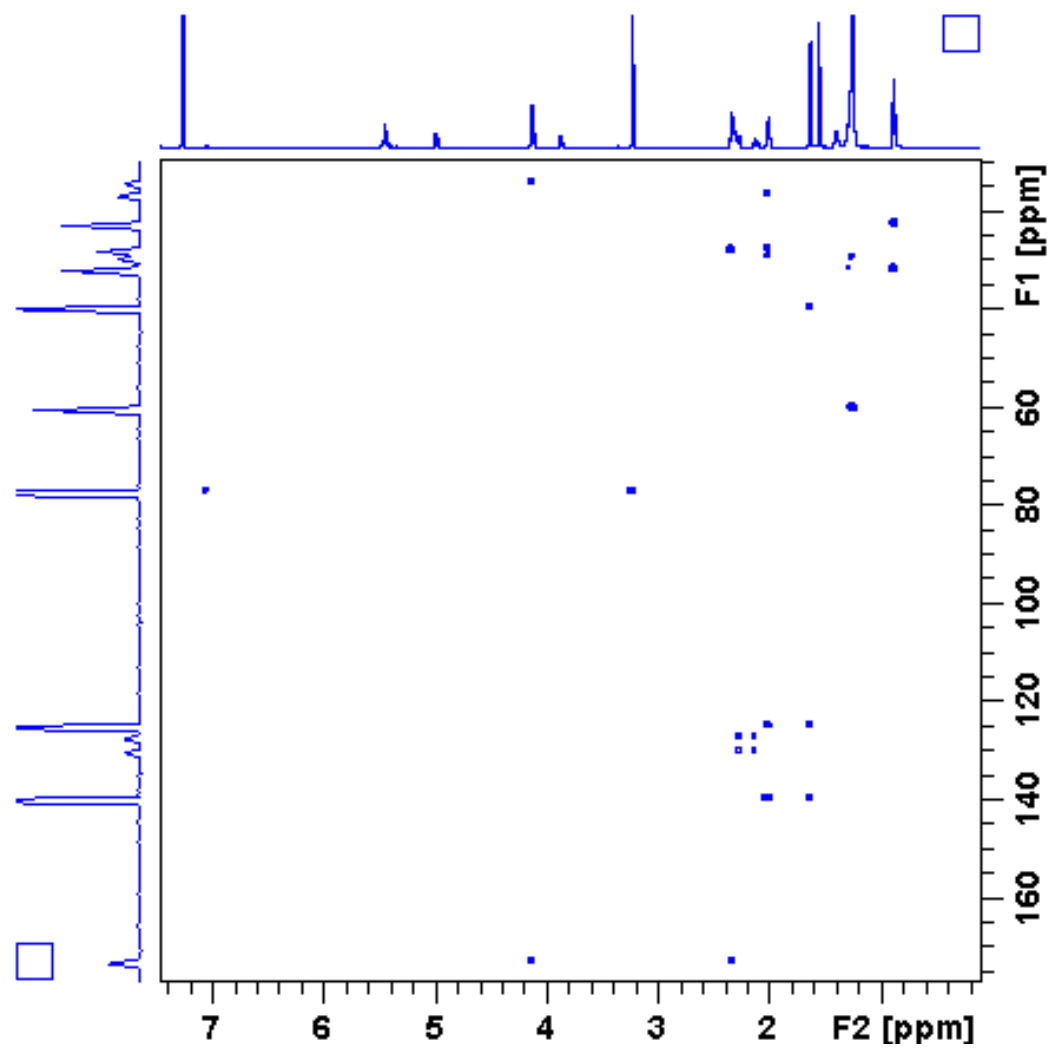

Figure S4. HMBC spectrum of compound 2 in CDCl<sub>3</sub> at 500 MHz

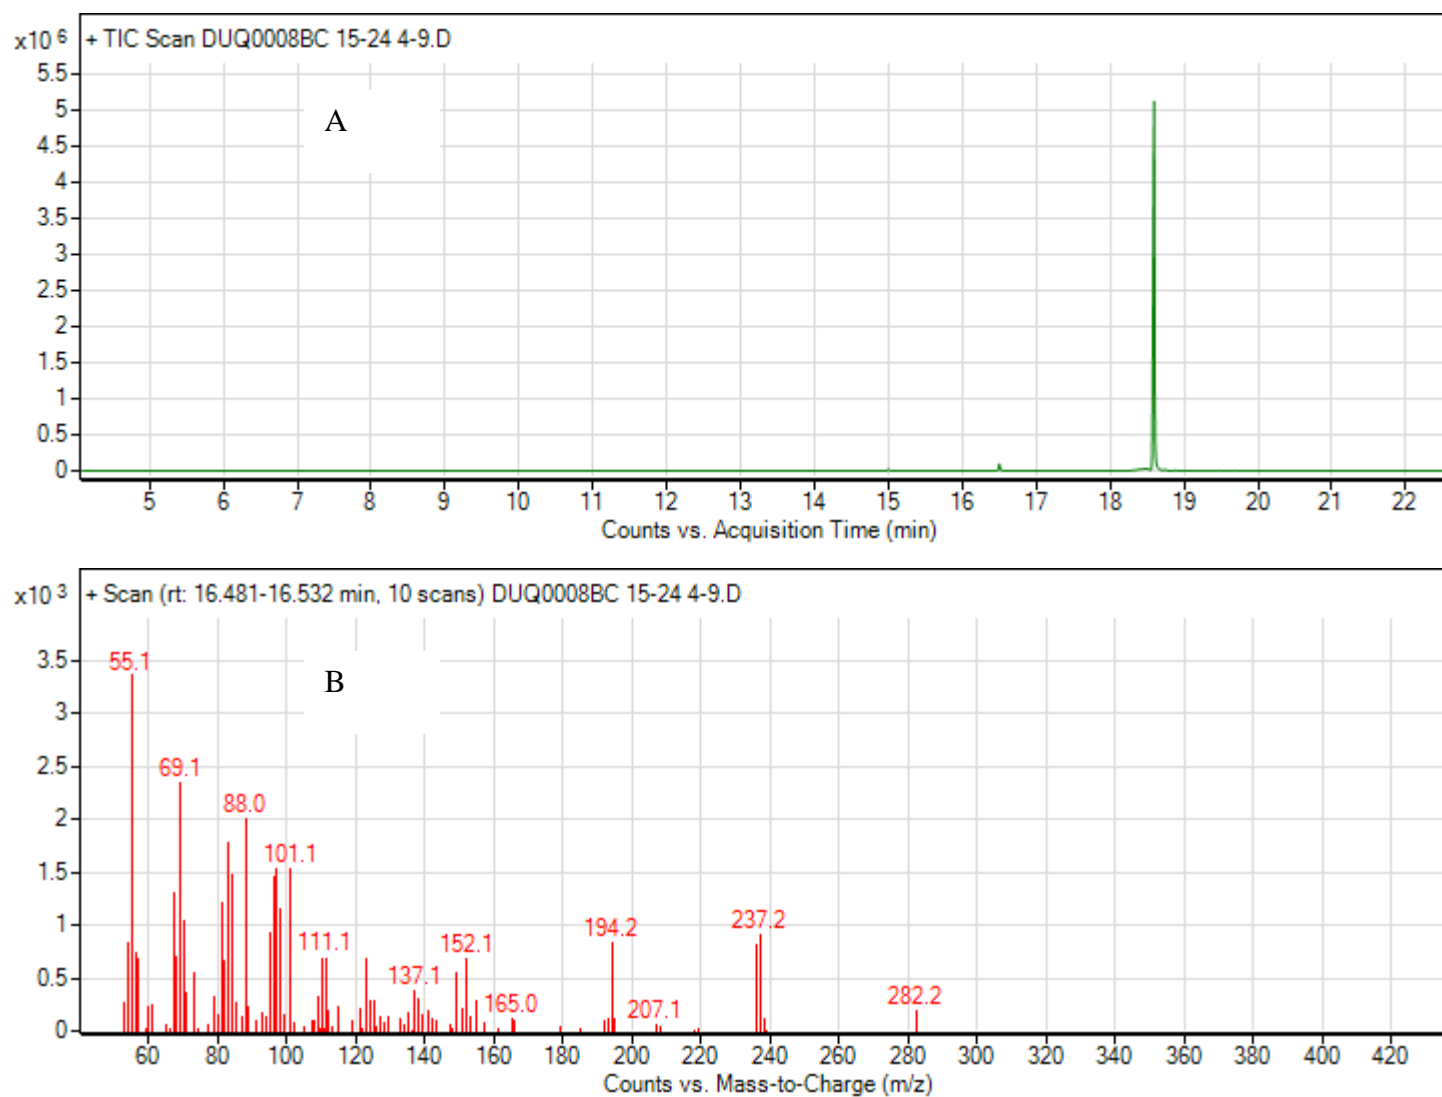

**Figure S5.** GC-MS chromatogram and mass spectrum of compound 2. (A) TIC, total ion chromatogram, of 1 and (B) mass spectrum of compound 2.
